# Supplementary material for: Chain dynamics of surfactants in mesoporous silica
Source: Royal Society of Chemistry journal article supplement (doi:10.1039/c3cp52562g), 2013-01-01
Supplement: c3cp52562g.pdf [file c3cp52562g.pdf]

## Supplementary Information:

### Chain dynamics of surfactant in mesoporous silica

B. B. Kharkov, S. V. Dvinskikh

Royal Institute of Technology KTH, Department of Chemistry, Teknikringen 36, SE-10044 Stockholm, Sweden

St. Petersburg State University, Institute of Physics, Ulyanovskaya 1, St. Petersburg, 198504 Russia

#### S1. Pulse sequences for SLF spectroscopy

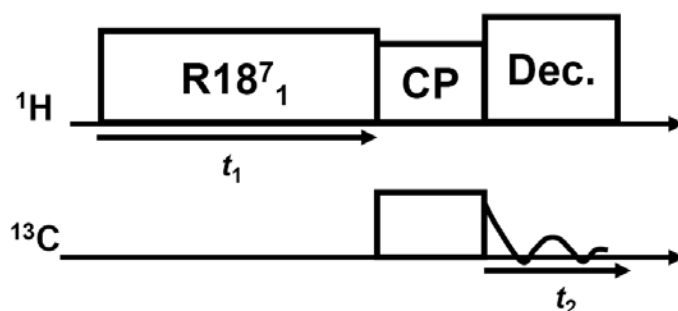

Fig. S1a. Proton Detected (encoded) Local Field spectroscopy with R-type recoupling (R-PDLF).<sup>1</sup> Proton magnetization evolves during the time period  $t_1$  under the effect of the heteronuclear recoupling sequence  $R18^7_1$ .<sup>2</sup> This magnetization, modulated by the  $^1\text{H}$ - $^{13}\text{C}$  dipolar interaction, is transferred via cross polarization (CP) to the  $^{13}\text{C}$  spins for detection during  $t_2$  in the presence of the heteronuclear proton decoupling.

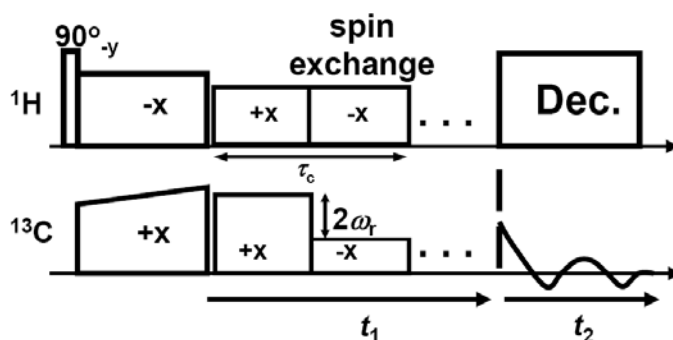

Fig. S1b. Amplitude- and Phase-Modulated Cross-Polarization (APM-CP).<sup>3,4</sup> After the CP signal enhancement, the dipolar evolution period is initiated by inverting the phase of the  $^1\text{H}$  spin-lock field. The CP fields during  $t_1$  period are phase- and amplitude-modulated to achieve the  $^1\text{H}$ - $^{13}\text{C}$  heteronuclear dipolar recoupling. Finally, the  $^{13}\text{C}$  signal is detected in the presence of the heteronuclear  $^1\text{H}$  decoupling.

## S2. $^1\text{H}$ MAS NMR spectrum of CTAB/MCM41 sample

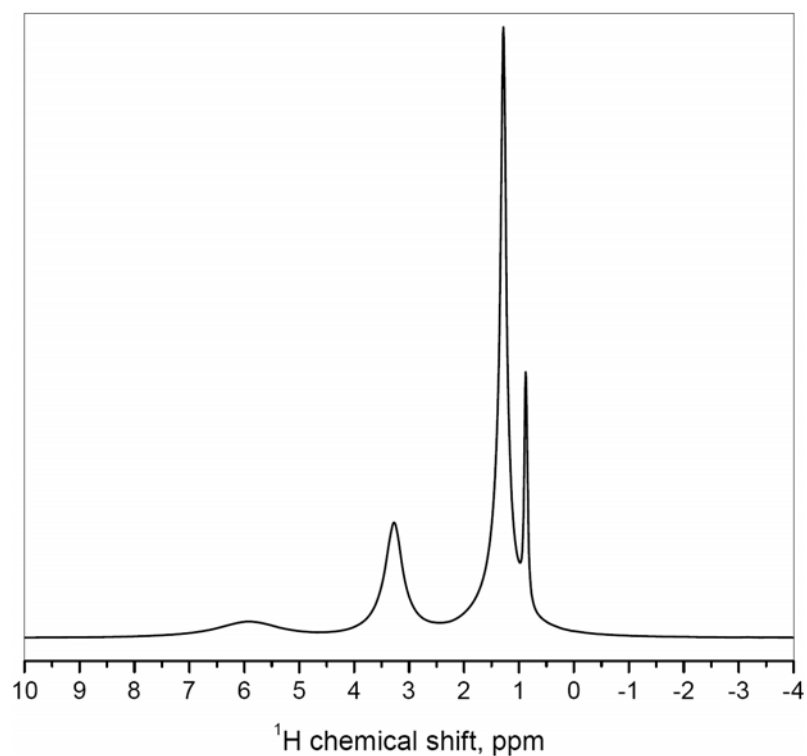

Fig. S2. Proton 500 MHz MAS NMR spectrum of the CTAB/MCM41 sample. The spinning speed is 15 kHz. Peak assignment is as following:  $-\text{CH}_3$  0.9 ppm;  $-\text{CH}_2-$  1.3 ppm;  $-\text{CH}_2-\text{N}(\text{CH}_3)_3$  3.3 ppm; water 5.8 ppm.<sup>5</sup>

## S3. Order parameter profiles in hexagonal lyotropic phase

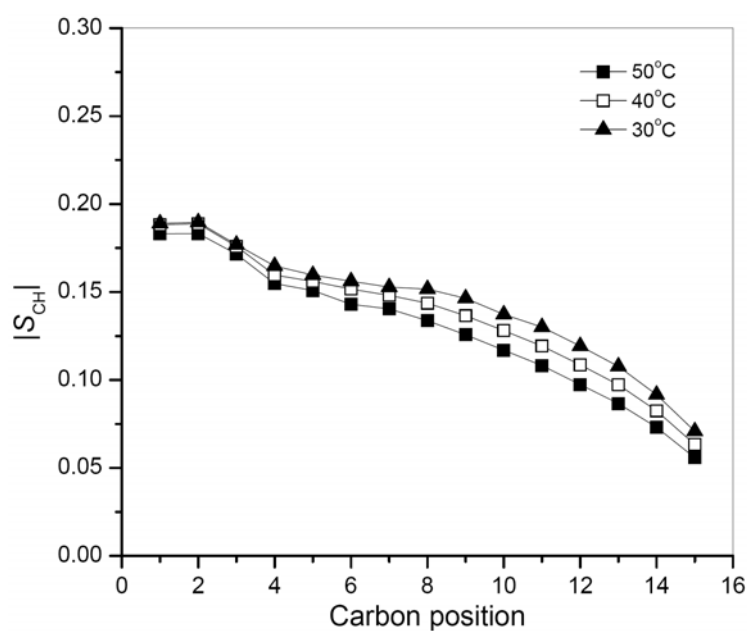

Fig. S3. Order parameters profiles in CTAB/D<sub>2</sub>O (28wt%) lyotropic hexagonal phase. The profiles are measured in the homogeneously aligned sample under the static condition and using low power PDLF spectroscopy.<sup>6</sup>

## S4. Dipolar spectra of CTAB/D<sub>2</sub>O and CTAB/MCM41 samples

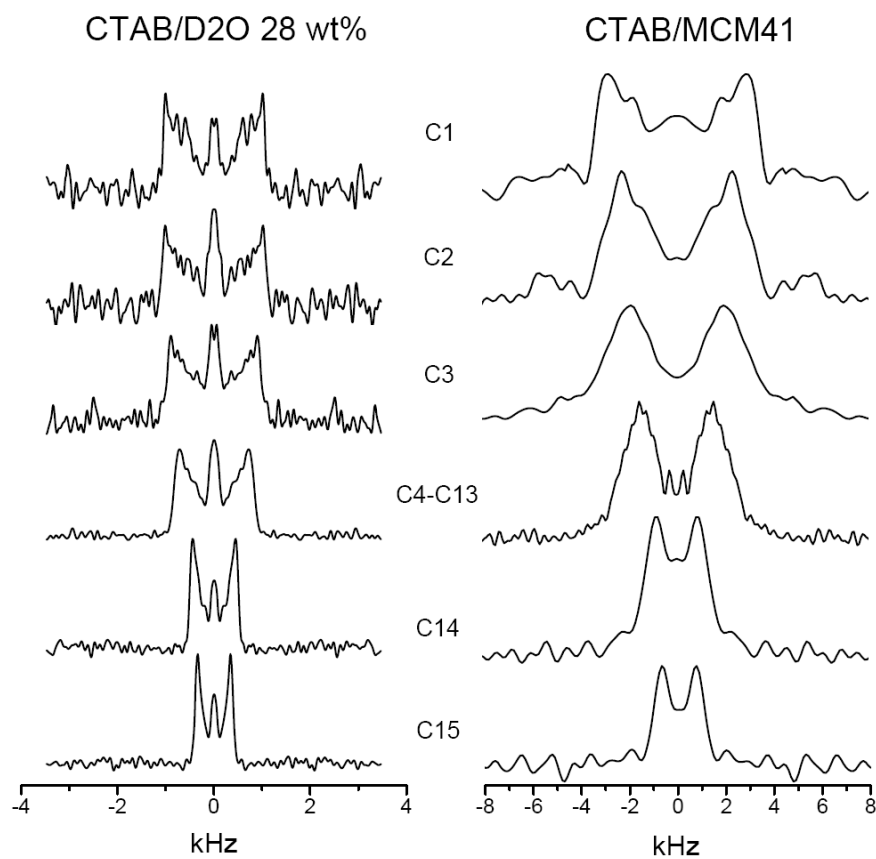

Fig. S4. A comparison of the  $^1\text{H}$ - $^{13}\text{C}$  dipolar spectra for the selected carbon positions. The cross-sections are taken from the 2D APMCP spectra collected at the spinning speed of 5 and 10 kHz for the CTAB/D<sub>2</sub>O and CTAB/MCM41 samples, respectively.

## References

1. S. V. Dvinskikh, H. Zimmermann, A. Maliniak and D. Sandström, *J. Magn. Reson.*, 2004, **168**, 194-201.
2. X. Zhao, M. Edén and M. H. Levitt, *Chem. Phys. Lett.*, 2001, **342**, 353-361.
3. S. V. Dvinskikh, V. Castro and D. Sandström, *Phys. Chem. Chem. Phys.*, 2005, **7**, 3255-3257.
4. S. Dvinskikh and V. I. Chizhik, *J. Exp. Theor. Phys.*, 2006, **102**, 91-101.
5. F. Kleitz, J. Blanchard, B. Zibrowius, F. Schuth, P. Agren and M. Linden, *Langmuir*, 2002, **18**, 4963-4971.
6. B. B. Kharkov, V. I. Chizhik and S. V. Dvinskikh, *J. Magn. Reson.*, 2012, **223**, 73-79.
